# Supplementary material for: Effects of Cannabidiol on Innate Immunity: Experimental Evidence and Clinical Relevance
Source: MDPI journal article supplement (doi:10.3390/ijms24043125), 2023-02-04
Supplement: s1 [file s1]

**Table S1.** Studies including in the review concerning CBD effects on innate immunity.

| Source                                     | Models                                                                                                                                           | Function investigated                                                                                                                                                                                                                                                     | Main results                                                                                                                                                                                                                                                      | CBD effect | Reference |
|--------------------------------------------|--------------------------------------------------------------------------------------------------------------------------------------------------|---------------------------------------------------------------------------------------------------------------------------------------------------------------------------------------------------------------------------------------------------------------------------|-------------------------------------------------------------------------------------------------------------------------------------------------------------------------------------------------------------------------------------------------------------------|------------|-----------|
| <b>Macrophages / monocytes</b>             |                                                                                                                                                  |                                                                                                                                                                                                                                                                           |                                                                                                                                                                                                                                                                   |            |           |
| RAW-264.7 monocytes/macrophages cell line. | Cells were treated with UDP, ATP IFN- $\gamma$ , LPS, dexamethasone to induce phagocytosis, then with CBD (10 $\mu$ M) and incubated with beads. | <ul style="list-style-type: none"> <li>• Evaluation of phagocytosis.</li> </ul>                                                                                                                                                                                           | <ul style="list-style-type: none"> <li>• Increase of phagocytosis.</li> </ul>                                                                                                                                                                                     | ↑          | [107]     |
| Swiss male mice (18-20 g) macrophages.     | Peritoneal exudate cells treated with CBD (from 0.001 to 1 $\mu$ M) and LPS.                                                                     | <ul style="list-style-type: none"> <li>• Evaluation of cytokines (IL-10 and 12) release.</li> <li>• Evaluation of chemotaxis fMLP-induced.</li> </ul>                                                                                                                     | <ul style="list-style-type: none"> <li>• Decrease of IL-10 release and increase of IL-12 release.</li> <li>• Decrease of chemotaxis fMLP-induced.</li> </ul>                                                                                                      | ↑↓         | [122]     |
| Swiss male mice (18-20 g).                 | Mice inoculated i.p. with thioglycolate and injected with CBD (15-30 mg/kg). Isolated macrophages were treated with LPS.                         | <ul style="list-style-type: none"> <li>• Evaluation of cytokines (IL-10 and 12) release by macrophages.</li> </ul>                                                                                                                                                        | <ul style="list-style-type: none"> <li>• Decrease of IL-10 release and increase of IL-12 release.</li> </ul>                                                                                                                                                      | ↑          | [122]     |
| Monocytes from healthy subjects.           | Human peripheral monocytes freshly isolated or precultured, treated with CBD and doxorubicin to induce apoptosis.                                | <ul style="list-style-type: none"> <li>• Evaluation of apoptosis.</li> </ul>                                                                                                                                                                                              | <ul style="list-style-type: none"> <li>• Increase of apoptosis of freshly isolated monocytes.</li> </ul>                                                                                                                                                          | ↓          | [127]     |
| THP-1 monocytes cell line.                 | Cells treated with CBD.                                                                                                                          | <ul style="list-style-type: none"> <li>• Evaluation of ROS production.</li> <li>• Evaluation of apoptosis.</li> </ul>                                                                                                                                                     | <ul style="list-style-type: none"> <li>• Increase of ROS generation.</li> <li>• Increase of apoptosis.</li> </ul>                                                                                                                                                 | ↓↑         | [124]     |
| Monocytes from healthy subjects            | Monocytes treated with CBD (16 $\mu$ M).                                                                                                         | <ul style="list-style-type: none"> <li>• Evaluation of apoptosis.</li> <li>• Evaluation of ROS generation.</li> </ul>                                                                                                                                                     | <ul style="list-style-type: none"> <li>• Increase of apoptosis</li> <li>• Increase of ROS generation.</li> </ul>                                                                                                                                                  | ↓↑         | [125]     |
| RAW 264.7 macrophages cell line.           | Cells were incubated CBD (5 $\mu$ M) and LPS+ATP.                                                                                                | <ul style="list-style-type: none"> <li>• Evaluation of NF-<math>\kappa</math>B activation.</li> <li>• Evaluation of NLRP3 inflammasome activation.</li> <li>• Evaluation of cytokines (IL-1<math>\beta</math>, TNF-<math>\alpha</math>, and MCP-1) expression.</li> </ul> | <ul style="list-style-type: none"> <li>• Inhibition of NF-<math>\kappa</math>B activation.</li> <li>• Suppression of activation of NLRP3 inflammasome.</li> <li>• Reduction of IL-1<math>\beta</math>, TNF-<math>\alpha</math>, and MCP-1 mRNA levels.</li> </ul> | ↓          | [116]     |

|                                          |                                                                                          |                                                                                                                                                                                                                                                                                                                                       |                                                                                                                                                                                                                                                                                                                                                                                             |    |       |
|------------------------------------------|------------------------------------------------------------------------------------------|---------------------------------------------------------------------------------------------------------------------------------------------------------------------------------------------------------------------------------------------------------------------------------------------------------------------------------------|---------------------------------------------------------------------------------------------------------------------------------------------------------------------------------------------------------------------------------------------------------------------------------------------------------------------------------------------------------------------------------------------|----|-------|
| 6-week-old male C57BL/6J mice.           | Mice with liver inflammation HFC-induced were hand-fed with CBD (5 mg/kg per day).       | <ul style="list-style-type: none"> <li>• Evaluation of hepatic macrophage infiltration.</li> </ul>                                                                                                                                                                                                                                    | <ul style="list-style-type: none"> <li>• Decrease of macrophages infiltration in liver.</li> </ul>                                                                                                                                                                                                                                                                                          | ↓  | [116] |
| U937 and RAW264.7 macrophages cell line. | Cells were treated with LPS and CBD.                                                     | <ul style="list-style-type: none"> <li>• Evaluation of cytokines (IL-8, IL-16, IL-32, IFN-<math>\gamma</math>, IL-1A, IL-6, IL-27, I-TAC, M-CSF, MCP-1, CCL2, CCL5, TNF-<math>\alpha</math>, MIF) levels in U937.</li> <li>• Evaluation of G-CSF, GM-CSF in RAW264.7.</li> <li>• Evaluation of ROS production in RAW264.7.</li> </ul> | <ul style="list-style-type: none"> <li>• Reduction in LPS-induced NF-<math>\kappa</math>B activity, and IL-8, and MCP-1 release.</li> <li>• Increased serpin E1, CXCL1, IL-6, MIF, IFN-<math>\gamma</math>, MCP-1, RANTES, and TNF-<math>\alpha</math> production</li> <li>• Reduction in MCP-1/CCL2, CCL5, eotaxin, and IL-2 production.</li> <li>• Increase of ROS generation.</li> </ul> | ↑↓ | [123] |
| THP-1 monocytes cell line.               | Cell stimulated with LPS+nigericin and treated with CBD (0.1, 1, and 10 $\mu$ M).        | <ul style="list-style-type: none"> <li>• Evaluation of cytokines (IL-1<math>\beta</math>, TNF-<math>\alpha</math>) release.</li> </ul>                                                                                                                                                                                                | <ul style="list-style-type: none"> <li>• Decrease of IL-1<math>\beta</math> release.</li> </ul>                                                                                                                                                                                                                                                                                             | ↓  | [119] |
| 6-week-old female C57BL/6 mice.          | Murine model of EAE treated with CBD (20 mg/kg).                                         | <ul style="list-style-type: none"> <li>• Evaluation of cytokines (CXCL9, CXCL10 and IL-1<math>\beta</math>) mRNA expression levels in macrophages.</li> <li>• Evaluation of macrophages infiltration into CNS.</li> </ul>                                                                                                             | <ul style="list-style-type: none"> <li>• Reduction of IL-1<math>\beta</math> and CXCL10 mRNA expression levels.</li> <li>• Reduction of macrophages infiltration.</li> </ul>                                                                                                                                                                                                                | ↓  | [103] |
| Monocytes from healthy subjects.         | Human primary monocytes activated through TLR 1–9 and treated with CBD (0.5–10 $\mu$ M). | <ul style="list-style-type: none"> <li>• Evaluation of cytokines (IL-4, IL-2, IP-10, IL-1<math>\beta</math>, TNF<math>\alpha</math>, MCP-1, IL-17a, IL-6, IL-10, IFN<math>\gamma</math>, IL-12p70, IL-8, and TGF-<math>\beta</math>1) secretion.</li> </ul>                                                                           | <ul style="list-style-type: none"> <li>• Inhibition of IL-1<math>\beta</math> and IL-6.</li> </ul>                                                                                                                                                                                                                                                                                          | ↓  | [121] |
| THP-1 monocytes cell line.               | Cells treated with LPS and CBD (from 5 to 100 $\mu$ M).                                  | <ul style="list-style-type: none"> <li>• Evaluation of cytokines (IL-1<math>\beta</math>, IL-6, and IL-10, MCP-1, VEGF, RANTES) expression.</li> <li>• Evaluation of mTOR, endothelial NOs, COX2 expression.</li> </ul>                                                                                                               | <ul style="list-style-type: none"> <li>• Reduction of TNF-<math>\alpha</math>, RANTES, IL-1<math>\beta</math> and -6 expression.</li> <li>• Reduction in levels of phosphorylated m-TOR Ser 2448.</li> <li>• Reduction of endothelial NOs.</li> <li>• Induction of COX2.</li> </ul>                                                                                                         | ↑↓ | [120] |

|                                                                                    |                                                                                                                |                                                                                                                                                                                                                         |                                                                                                                                                                                                    |    |       |
|------------------------------------------------------------------------------------|----------------------------------------------------------------------------------------------------------------|-------------------------------------------------------------------------------------------------------------------------------------------------------------------------------------------------------------------------|----------------------------------------------------------------------------------------------------------------------------------------------------------------------------------------------------|----|-------|
| RAW 264.7 macrophages cell line.                                                   | Cells were stimulated with LPS and treated with CBD.                                                           | <ul style="list-style-type: none"> <li>• Evaluation of cytokines (TNF-<math>\alpha</math> and IL-1<math>\beta</math>) release.</li> </ul>                                                                               | <ul style="list-style-type: none"> <li>• inhibition of TNF-<math>\alpha</math> and IL-1<math>\beta</math>.</li> </ul>                                                                              | ↓  | [117] |
| 5/8-week-old male Wistar rats (150-250 g).                                         | Rats with pulmonary hypertension-MCT induced, injected <i>i.p.</i> with CBD (10 mg/kg)                         | <ul style="list-style-type: none"> <li>• Number of infiltrated macrophages in lung.</li> </ul>                                                                                                                          | <ul style="list-style-type: none"> <li>• Decrease of number of macrophages infiltrated in lung.</li> </ul>                                                                                         | ↓  | [126] |
| Monocytes from healthy subjects.                                                   | Monocytes differentiated in macrophages, treated with CBD (10 $\mu$ M).                                        | <ul style="list-style-type: none"> <li>• Evaluation of transcriptional cell profile.</li> <li>• Evaluation of autophagy process.</li> </ul>                                                                             | <ul style="list-style-type: none"> <li>• Inhibition of cGAS-STING-mediated activation of type I Interferon response genes</li> <li>• Upregulation of autophagy receptor p62/SQSTM1</li> </ul>      | ↓↑ | [129] |
| THP monocytic cell line.                                                           | Cells treated with CBD (10 $\mu$ M).                                                                           | <ul style="list-style-type: none"> <li>• Evaluation of transcriptional cell profile.</li> <li>• Evaluation of autophagy process.</li> </ul>                                                                             | <ul style="list-style-type: none"> <li>• Inhibition of cGAS-STING-mediated activation of type I Interferon response genes</li> <li>• Upregulation of autophagy receptor p62/SQSTM1</li> </ul>      | ↓↑ | [129] |
| 8- to 11-week-old female and male and 8-month-old C57BL/6 female mice macrophages. | Exudate macrophages were treated with CBD (5 $\mu$ M) and stimulated with LPS.                                 | <ul style="list-style-type: none"> <li>• Evaluation of NO production.</li> <li>• Evaluation of cytokines (IL6, TNF-<math>\alpha</math>, CXCL2, G-CSF) expression.</li> <li>• Evaluation of MHCII expression.</li> </ul> | <ul style="list-style-type: none"> <li>• Inhibition of NO secretion.</li> <li>• Inhibition of IL-6, TNF-<math>\alpha</math>, CXCL2 expression.</li> <li>• Decrease of MHCII expression.</li> </ul> | ↓  | [118] |
| 8- to 11-week-old female and male and 8-month-old C57BL/6 female mice.             | Murine colitis DSS-induced, injection <i>i.p.</i> of CBD (5 mg/kg).                                            | <ul style="list-style-type: none"> <li>• Evaluation of Macrophages infiltration in colon.</li> </ul>                                                                                                                    | <ul style="list-style-type: none"> <li>• Decrease of cell infiltration in colon.</li> </ul>                                                                                                        | ↓  | [118] |
| <b>Mast cells</b>                                                                  |                                                                                                                |                                                                                                                                                                                                                         |                                                                                                                                                                                                    |    |       |
| RBL-2H3 cells line.                                                                | RBL-2H3 mast cell activated with IgE receptor, incubated with HSA antigen and treated with CBD (1-10 $\mu$ M). | <ul style="list-style-type: none"> <li>• Beta-hexosaminidase cells release.</li> <li>• Evaluation of Ca<sup>2+</sup> intracellular levels.</li> </ul>                                                                   | <ul style="list-style-type: none"> <li>• Enhancement of beta-hexosaminidase cells release.</li> <li>• Rise of intracellular Ca<sup>2+</sup></li> </ul>                                             | ↑  | [89]  |
| Male Swiss OF1 mice (30–40 g) mast cells.                                          | Mice model of intestinal inflammation, injection <i>i.p.</i> of CBD (10 mg/kg) before LPS treatment.           | <ul style="list-style-type: none"> <li>• Release of mast cells chymase and MMP9.</li> </ul>                                                                                                                             | <ul style="list-style-type: none"> <li>• Inhibition of mast cells chymase and MMP9 release.</li> </ul>                                                                                             | ↓  | [90]  |
| <b>Astrocytes</b>                                                                  |                                                                                                                |                                                                                                                                                                                                                         |                                                                                                                                                                                                    |    |       |

|                                                 |                                                                                                                                        |                                                                                                                                                                                 |                                                                                                                                                                                  |    |       |
|-------------------------------------------------|----------------------------------------------------------------------------------------------------------------------------------------|---------------------------------------------------------------------------------------------------------------------------------------------------------------------------------|----------------------------------------------------------------------------------------------------------------------------------------------------------------------------------|----|-------|
| Male ddY mice (25-35 g).                        | Mouse were subjected to middle cerebral artery occlusion and treated with of CBD (3 mg/kg).                                            | <ul style="list-style-type: none"> <li>• Evaluation of MPO activity in brain.</li> </ul>                                                                                        | <ul style="list-style-type: none"> <li>• Reduction of MPO activity.</li> </ul>                                                                                                   | ↓  | [94]  |
| 5/7-week-old male Swiss albino mice (30-40 g).  | Mice were subjected to bilateral common carotid artery occlusion and treated with CBD (3-30 mg/kg)                                     | <ul style="list-style-type: none"> <li>• Evaluation of GFAP immunoreactivity in brain.</li> </ul>                                                                               | <ul style="list-style-type: none"> <li>• Reduction in GFAP expression.</li> </ul>                                                                                                | ↓  | [95]  |
| HBMEC and human astrocytes.                     | BBB permeability model by co-cultures of HBMEC and human astrocyte in oxygen-glucose deprivation conditions, treated with CBD (10 μM). | <ul style="list-style-type: none"> <li>• Evaluation of BBB permeability.</li> <li>• Evaluation of LDH release.</li> <li>• Evaluation of VCAM-1 and VEGF levels.</li> </ul>      | <ul style="list-style-type: none"> <li>• Reduction BBB permeability.</li> <li>• Decrease VCAM-1 levels.</li> <li>• Increased VEGF levels.</li> </ul>                             | ↓  | [92]  |
| Rat CTX-TNA2 astrocytes.                        | Astrocytes were treated with H <sub>2</sub> O <sub>2</sub> and CBD (1μM).                                                              | <ul style="list-style-type: none"> <li>• Evaluation of ROS production.</li> <li>• Evaluation of proliferation.</li> <li>• Evaluation of apoptosis.</li> </ul>                   | <ul style="list-style-type: none"> <li>• Reduction in ROS production.</li> <li>• Increase in proliferation.</li> <li>• Reduced early apoptosis.</li> </ul>                       | ↓  | [93]  |
| 2/4-day-old C57BL/6J mice astrocytes.           | Astrocytes incubated with CBD (5-10 μM) followed by LPS.                                                                               | <ul style="list-style-type: none"> <li>• Evaluation of IL-6 and TNF-α release.</li> <li>• Evaluation of Nf-κB and STAT3 pathways.</li> </ul>                                    | <ul style="list-style-type: none"> <li>• Inhibition of IL-6 release but not TNF-α.</li> <li>• Inhibition of NF-κB and STAT3 phosphorylation.</li> </ul>                          | ↓  | [105] |
| 6-week-old C57BL/6J mice.                       | Mice were injected i.p. with CBD (10mg/kg or 75mg/kg) followed by LPS.                                                                 | <ul style="list-style-type: none"> <li>• Evaluation of mRNA expression of IL-1β, TNF-α and IL-6 by astrocytes.</li> </ul>                                                       | <ul style="list-style-type: none"> <li>• Inhibition of mRNA expression of IL-1β and TNF-α but not IL-6.</li> </ul>                                                               | ↓  | [105] |
| <b>Oligodendrocytes</b>                         |                                                                                                                                        |                                                                                                                                                                                 |                                                                                                                                                                                  |    |       |
| 12-day-old Sprague Dawley rat oligodendrocytes. | Oligodendrocytes incubated with CBD (0,1-10 μM).                                                                                       | <ul style="list-style-type: none"> <li>• Evaluation of ROS generation.</li> <li>• Evaluation of Ca<sup>2+</sup> release.</li> <li>• Evaluation of apoptosis pathway.</li> </ul> | <ul style="list-style-type: none"> <li>• Increase of ROS production.</li> <li>• Increase of Ca<sup>2+</sup> release.</li> <li>• Increase of apoptosis.</li> </ul>                | ↓↑ | [110] |
| 0/2-days-old Wistar rats OPC.                   | OPC were treated with LPS/IFNγ/H <sub>2</sub> O <sub>2</sub> / Tunicamycin in presence of CBD (1 μM).                                  | <ul style="list-style-type: none"> <li>• Evaluation of ROS generation.</li> <li>• Evaluation of apoptosis.</li> </ul>                                                           | <ul style="list-style-type: none"> <li>• Decrease of ROS production.</li> <li>• Decrease of caspase 3 expression.</li> <li>• Decrease of apoptosis ER stress-induced.</li> </ul> | ↓↑ | [111] |
| <b>Microglia cells</b>                          |                                                                                                                                        |                                                                                                                                                                                 |                                                                                                                                                                                  |    |       |

|                                            |                                                                                                                                                              |                                                                                                                                                                                                                                                                          |                                                                                                                                                                                                                                                |    |       |
|--------------------------------------------|--------------------------------------------------------------------------------------------------------------------------------------------------------------|--------------------------------------------------------------------------------------------------------------------------------------------------------------------------------------------------------------------------------------------------------------------------|------------------------------------------------------------------------------------------------------------------------------------------------------------------------------------------------------------------------------------------------|----|-------|
| 8/10-week-old male C57BL6 mice microglia.  | Microglial cells were treated with UDP, ATP, IFN- $\gamma$ , LPS, dexamethasone to induce phagocytosis, then with CBD (10 $\mu$ M) and incubated with beads. | <ul style="list-style-type: none"> <li>• Evaluation of phagocytosis.</li> </ul>                                                                                                                                                                                          | <ul style="list-style-type: none"> <li>• Increase of phagocytosis.</li> </ul>                                                                                                                                                                  | ↑  | [107] |
| BV-2 microglial cells line.                | Microglial cells were treated with UDP, ATP IFN- $\gamma$ , LPS, dexamethasone to induce phagocytosis, then with CBD (10 $\mu$ M) and incubated with beads.  | <ul style="list-style-type: none"> <li>• Evaluation of phagocytosis.</li> </ul>                                                                                                                                                                                          | <ul style="list-style-type: none"> <li>• Increase of phagocytosis.</li> </ul>                                                                                                                                                                  | ↑  | [107] |
| HAPI cells line.                           | Microglial cells were treated with UDP, ATP IFN- $\gamma$ , LPS, dexamethasone to induce phagocytosis, then with CBD (10 $\mu$ M) and incubated with beads.  | <ul style="list-style-type: none"> <li>• Evaluation of phagocytosis.</li> </ul>                                                                                                                                                                                          | <ul style="list-style-type: none"> <li>• Increase of phagocytosis.</li> </ul>                                                                                                                                                                  | ↑  | [107] |
| BV-2 mouse microglial cell line.           | BV-2 microglial cells were treated with LPS and CBD (10 $\mu$ M).                                                                                            | <ul style="list-style-type: none"> <li>• Evaluation of IL-1<math>\beta</math>, IL-6, and IFN-<math>\beta</math> production and release.</li> </ul>                                                                                                                       | <ul style="list-style-type: none"> <li>• Reduction of IL-1<math>\beta</math>, IL-6, and IFN-<math>\beta</math> production and release.</li> </ul>                                                                                              | ↓  | [101] |
| BV-2 mouse and N-13 microglial cells line. | BV-2 and N-13 microglial cells treated with CBD (0,1 $\mu$ M).                                                                                               | <ul style="list-style-type: none"> <li>• Evaluation of microglia migration.</li> <li>• Evaluation of NO generation.</li> <li>• Evaluation of IL-6 and TNF-<math>\alpha</math> gene expression.</li> <li>• Evaluation of intracellular Ca<sup>2+</sup> levels.</li> </ul> | <ul style="list-style-type: none"> <li>• Increase in microglial cells migration.</li> <li>• Inhibition of NO generation.</li> <li>• Increase in IL-6 gene expression.</li> <li>• Reduction in intracellular Ca<sup>2+</sup> levels.</li> </ul> | ↑↓ | [104] |
| 0-day-old BALB/c mice microglial cells.    | Microglial cells treated with CBD (16 $\mu$ M).                                                                                                              | <ul style="list-style-type: none"> <li>• Evaluation of apoptosis pathway.</li> </ul>                                                                                                                                                                                     | <ul style="list-style-type: none"> <li>• Increase in caspase 8 and 29 activation.</li> </ul>                                                                                                                                                   | ↓  | [106] |
| 6-week-old female C57BL/6 mice.            | Murine model of EAE treated with CBD (20 mg/kg).                                                                                                             | <ul style="list-style-type: none"> <li>• Microglia Transcriptional Profile.</li> </ul>                                                                                                                                                                                   | <ul style="list-style-type: none"> <li>• Shift in the transcriptional profile to anti-inflammatory profile in microglia within CNS.</li> </ul>                                                                                                 | ↓  | [103] |
| 6-week-old C57BL/6J mice microglial cells. | Microglial cells incubated with CBD (10 $\mu$ M) followed by LPS.                                                                                            | <ul style="list-style-type: none"> <li>• Evaluation of IL-6 and TNF-<math>\alpha</math> release.</li> </ul>                                                                                                                                                              | <ul style="list-style-type: none"> <li>• Inhibition of IL-6 release but not TNF-<math>\alpha</math>.</li> </ul>                                                                                                                                | ↓  | [105] |
| 6-week-old C57BL/6J mice.                  | Mice were injected i.p with CBD (10mg/kg or 75mg/kg) followed by LPS.                                                                                        | <ul style="list-style-type: none"> <li>• Evaluation of mRNA expression of IL-1<math>\beta</math>, TNF-<math>\alpha</math> and IL-6 by microglia.</li> </ul>                                                                                                              | <ul style="list-style-type: none"> <li>• Inhibition of mRNA expression of IL-1<math>\beta</math> and TNF-<math>\alpha</math> but not IL-6.</li> </ul>                                                                                          | ↓  | [105] |

|                                         |                                                                                                                                                                      |                                                                                                                                                                   |                                                                                                                    |   |       |
|-----------------------------------------|----------------------------------------------------------------------------------------------------------------------------------------------------------------------|-------------------------------------------------------------------------------------------------------------------------------------------------------------------|--------------------------------------------------------------------------------------------------------------------|---|-------|
| 7/9-day-old Wistar rat microglia.       | Microglia isolated from Hippocampi slices treated with kainite acid and incubated with CBD (0.1–10 $\mu$ M).                                                         | <ul style="list-style-type: none"> <li>• Evaluation of microglia activation.</li> </ul>                                                                           | <ul style="list-style-type: none"> <li>• Inhibition of microglia activation.</li> </ul>                            | ↓ | [99]  |
| APP/PS1 female mice microglia.          | Microglial cells treated with CBD (5 $\mu$ M).                                                                                                                       | <ul style="list-style-type: none"> <li>• Evaluation of Phagocytic Receptors Expression TRPV2, TREM2, GPR34, CR3.</li> </ul>                                       | <ul style="list-style-type: none"> <li>• Increase of mRNA expression of TRPV2 and TREM2.</li> </ul>                | ↑ | [108] |
| <b>Polymorphonuclear leukocytes</b>     |                                                                                                                                                                      |                                                                                                                                                                   |                                                                                                                    |   |       |
| Female mice C57BL/6.                    | PMNs were treated with CBD (6 $\mu$ M).                                                                                                                              | <ul style="list-style-type: none"> <li>• Evaluation of ROS production.</li> </ul>                                                                                 | <ul style="list-style-type: none"> <li>• Suppression of Zymosan-induced ROS.</li> </ul>                            | ↓ | [163] |
| PMN from human healthy subjects.        | PMNs were activated with fMLP and treated with CBD (0,00001 to 1 $\mu$ M).                                                                                           | <ul style="list-style-type: none"> <li>• Evaluation of chemotaxis.</li> </ul>                                                                                     | <ul style="list-style-type: none"> <li>• Decreased chemotaxis.</li> </ul>                                          | ↓ | [153] |
| Male ddY mice (25–35 g).                | Ischemic brain damage was induced by focal I/R injury, CBD (3mg/kg) was administered i.p. immediately before and 3 h after cerebral ischemia.                        | <ul style="list-style-type: none"> <li>• Evaluation of PMNs infiltration in brain.</li> </ul>                                                                     | <ul style="list-style-type: none"> <li>• Decreased PMNs infiltration.</li> </ul>                                   | ↓ | [94]  |
| Male Wistar rats (250–350 g).           | Experimental periodontitis was induced by a ligature placement around both mandible first molars before CBD treatment (5 mg/kg) administered i.p. daily for 30 days. | <ul style="list-style-type: none"> <li>• Evaluation of PMNs infiltration in gingival tissue.</li> <li>• Evaluation of PMN activity in gingival tissue.</li> </ul> | <ul style="list-style-type: none"> <li>• Reduced PMNs infiltration and MPO activity in gingival tissue.</li> </ul> | ↓ | [157] |
| PMN from human healthy subjects.        | PMNs were pre-treated with 1 $\mu$ M CBD and activated by TNF- $\alpha$ .                                                                                            | <ul style="list-style-type: none"> <li>• Evaluation of PMNs adhesion.</li> </ul>                                                                                  | <ul style="list-style-type: none"> <li>• Reduced PMNs adhesion.</li> </ul>                                         | ↓ | [155] |
| Male mice C57BL/6j.                     | Mouse model of hepatic I/R injury, CBD treatment (3 and/or 10 mg/kg) was injected i.p 60 minutes before the occlusion of hepatic artery.                             | <ul style="list-style-type: none"> <li>• Evaluation of PMNs infiltration and activity in liver.</li> </ul>                                                        | <ul style="list-style-type: none"> <li>• Reduced PMNs infiltration and MPO activity in liver.</li> </ul>           | ↓ | [155] |
| 8-week-old male mice C57BL/6 (20-25 g). | Acute lung injury was induced by intranasal instillation of LPS, CBD (0.3, 1.0, 10, 20, 30, 40, and 80 mg/kg) was administered i.p. 60 minutes before lung injury.   | <ul style="list-style-type: none"> <li>• Evaluation of PMNs Infiltration and activity in lung.</li> </ul>                                                         | <ul style="list-style-type: none"> <li>• Decreased PMNs infiltration and MPO activity in lung.</li> </ul>          | ↓ | [36]  |

|                                                         |                                                                                                                                                                                      |                                                                                                                                                                                   |                                                                                                                                                                                           |   |       |
|---------------------------------------------------------|--------------------------------------------------------------------------------------------------------------------------------------------------------------------------------------|-----------------------------------------------------------------------------------------------------------------------------------------------------------------------------------|-------------------------------------------------------------------------------------------------------------------------------------------------------------------------------------------|---|-------|
| 5/8-week-old female mice C57BL/6.                       | Pulmonary inflammation was induced by intranasal instillation of LPS, CBD (75 mg/kg) were co-administered by oral gavage.                                                            | <ul style="list-style-type: none"> <li>• PMN count in lung.</li> <li>• Evaluation of TNF-<math>\alpha</math>; IL-6, IL17a; IL-23 and G-CSF mRNA expression levels.</li> </ul>     | <ul style="list-style-type: none"> <li>• Enhanced PMNs infiltration in lung.</li> <li>• Increase in mRNA expression levels for TNF-<math>\alpha</math>; IL-6, IL-23 and G-CSF.</li> </ul> | ↑ | [161] |
| Male adult Dunkin-Hartley guinea pigs (250-350 g).      | Airway inflammation was induced by exposition to aerosolized solution of LPS or intranasal instillation of TNF- $\alpha$ , CBD (10 mg/ml) was nebulized 30 minutes before the injury | <ul style="list-style-type: none"> <li>• PMNs infiltration in airways.</li> </ul>                                                                                                 | <ul style="list-style-type: none"> <li>• No effects of CBD on PMNs infiltration in airways.</li> </ul>                                                                                    | ↔ | [162] |
| PMN from human healthy subjects.                        | PMNs were activated with PMA before 1 $\mu$ M CBD treatment.                                                                                                                         | <ul style="list-style-type: none"> <li>• Evaluation of ROS production.</li> </ul>                                                                                                 | <ul style="list-style-type: none"> <li>• Reduction in PMA-induced ROS production.</li> </ul>                                                                                              | ↓ | [159] |
| 10/12-week-old female mice C57BL/6J (25 g).             | Alcohol induced liver steatosis; CBD (10 mg/kg) was administered i.p. for 11 days during alcohol exposure.                                                                           | <ul style="list-style-type: none"> <li>• Evaluation of PMNs infiltration and activity in liver.</li> <li>• Evaluation of MPO.</li> <li>• Evaluation of ROS production.</li> </ul> | <ul style="list-style-type: none"> <li>• Decreased in PMNs infiltration</li> <li>• Decreased MPO activity in liver.</li> <li>• Decrease in PMNs oxidative burst.</li> </ul>               | ↓ | [159] |
| 9/11-week-old male ICR mice.                            | Acute kidney injury was induced by bilateral renal I/R injury, CBD (10 mg/kg) was administered i.p. 10 minutes before removal of vascular clamps.                                    | Evaluation of PMNs polarization (N1/N2 phenotype ratio).                                                                                                                          | <ul style="list-style-type: none"> <li>• Increased N2 PMNs levels in kidney.</li> <li>• Decreased N1 PMNs levels in kidney.</li> </ul>                                                    | ↓ | [167] |
| Male BALB/c mice (20-30 g) and CB2R -/- mice.           | Model of corneal hyperalgesia, CBD was administered topically post cauterization.                                                                                                    | Evaluation of PMNs infiltration in cornea.                                                                                                                                        | Reduced PMNs infiltration in cornea.                                                                                                                                                      | ↓ | [158] |
| PMN from human healthy subjects.                        | PMNs were activated with fMLP and IL-8 and co-treated with CBD (0.01-10 $\mu$ M).                                                                                                    | <ul style="list-style-type: none"> <li>• Evaluation of chemotaxis and ROS production.</li> <li>• Evaluation of TNF-<math>\alpha</math> production.</li> </ul>                     | <ul style="list-style-type: none"> <li>• Decreased chemotaxis and ROS production.</li> <li>• Decreased TNF-<math>\alpha</math> (mRNA and protein) levels.</li> </ul>                      | ↓ | [156] |
| PMN from human healthy subjects and psoriasis patients. | PMNs were activated with LPS and treated with CBD (10 $\mu$ M).                                                                                                                      | <ul style="list-style-type: none"> <li>• Evaluation of NET production.</li> <li>• Evaluation of MPO.</li> </ul>                                                                   | <ul style="list-style-type: none"> <li>• Inhibition of NET production and cfDNA.</li> <li>• Reduction of MPO levels.</li> </ul>                                                           | ↓ | [139] |

|                                                                          |                                                                                                                                                             |                                                                                                                                                                                                                      |                                                                                                                                                                                                               |    |       |
|--------------------------------------------------------------------------|-------------------------------------------------------------------------------------------------------------------------------------------------------------|----------------------------------------------------------------------------------------------------------------------------------------------------------------------------------------------------------------------|---------------------------------------------------------------------------------------------------------------------------------------------------------------------------------------------------------------|----|-------|
| PMN from human healthy subjects.                                         | PMNs were activated with fMLP and treated with CBD (from 0.1 $\mu$ M to 1000 $\mu$ M).                                                                      | <ul style="list-style-type: none"> <li>• Evaluation of chemotaxis.</li> <li>• Evaluation of oxygen consumption.</li> <li>• Evaluation of ROS production.</li> </ul>                                                  | <ul style="list-style-type: none"> <li>• Decreased chemotaxis.</li> <li>• Decreased of oxygen consumption.</li> <li>• Increased ROS production.</li> </ul>                                                    | ↓↑ | [154] |
| 8/9-weeks-old male nude rats (Hsd:RH-Foxn1 <sup>rnu</sup> ) (260–302 g). | Skin inflammation model was induced by irradiation with UVA/UVB, CBD (120 mg/kg) was administered topically together with UV radiation, at different times. | <ul style="list-style-type: none"> <li>• Evaluation of ROS production.</li> <li>• Evaluation of TNF-<math>\alpha</math> production.</li> <li>• Evaluation of NF-<math>\kappa</math>B and CB1R expression.</li> </ul> | <ul style="list-style-type: none"> <li>• Reduction of ROS production.</li> <li>• Reduction of TNF-<math>\alpha</math> levels.</li> <li>• Reduction of NF-<math>\kappa</math>B and CB1R expression.</li> </ul> | ↓  | [164] |
| Male adult Dunkin-Hartley guinea pigs (250-350 g).                       | Pulmonary inflammation was induced by aerosolised solution of LPS, CBD (10-50-100 mg/kg) was administered i.p. 1 hour before LPS treatment.                 | <ul style="list-style-type: none"> <li>• Evaluation of PMNs infiltration in the airways.</li> </ul>                                                                                                                  | <ul style="list-style-type: none"> <li>• Decreased the PMNs infiltration in airways.</li> </ul>                                                                                                               | ↓  | [160] |
| PMNs from healthy subjects.                                              | Resting and activated cells treated with CBD.                                                                                                               | <ul style="list-style-type: none"> <li>• Evaluation of COX 1/2 and PGE<sub>2</sub>.</li> </ul>                                                                                                                       | <ul style="list-style-type: none"> <li>• Inhibition of expression of COX-1 and COX-2 mRNA in activated PMNs.</li> </ul>                                                                                       | ↓  | [26]  |

IgE = immunoglobulin E; HSA = human serum albumin; CBD = cannabidiol; LPS = lipopolysaccharide;; MMP9 = metalloproteinase 9; MPO = myeloperoxidase; GFAP = glial fibrillary acidic protein; HBMEC = human brain microvascular endothelial cell; BBB blood brain barrier; LDH = lactate dehydrogenase; V-CAM1 = vascular cell adhesion protein 1; VEGF = vascular endothelial growth factor; ROS = reactive oxygen species; IL (interleukin)- 1Ra/8/16/32/1A/6/27/2/1 $\beta$ /4/17a/10/12p70; UDP = uridine diphosphate; ATP = adenosine triphosphate; IFN- $\gamma$ / $\beta$  = interferon- $\gamma$ / $\beta$ ; TNF- $\alpha$  = tumor necrosis factor  $\alpha$ ; NO = nitric oxide; NOs = nitric oxide synthase; EAE = experimental autoimmune encephalomyelitis; CNS = central nervous system; CXCL1/9/10 = C-X-C motif chemokine ligand 1/9/10; ; I-TAC = interferon-inducible T cell alpha chemoattractant; M-CSF = macrophage colony stimulating factor 1; MCP-1 = monocyte chemoattractant protein-1; CCL2/5 = C-C motif chemokine ligand 2/5; NF- $\kappa$ B = nuclear factor kappa-light-chain-enhancer of activated B cells; G-CSF = granulocyte - colony stimulating factor; GM-CSF = granulocyte-macrophage colony-stimulating factor; MIF = macrophage migration inhibitory factor; TLR 1/3/4/9 = toll like receptor 1/3/4/9; TGF-  $\beta$ 1 = transforming growth factor  $\beta$ 1; IP-10 = interferon gamma-induced protein 10; mTOR = mammalian target of rapamycin; COX 1/2 = cyclooxygenase 1/2; MCT = monocrotaline; MHCII = major histocompatibility complex class II; DSS = dextran sodium sulfate; cGAS-STING = cyclic GMP–AMP synthase-stimulator of interferon genes; NLRP3 = NLR family pyrin domain containing 3; HFC = high fat-cholesterol diet; STAT3 = signal transducer and activator of transcription 3; H<sub>2</sub>O<sub>2</sub> = hydrogen peroxide; TRPV2 = transient receptor potential cation channel subfamily v member 2; TREM2 = triggering receptor expressed on myeloid cells 2; GPR34 = G protein-coupled receptor 34; CR3 = complement receptor 3; PMNs = polymorphonuclear neutrophils; RANTES = regulated upon activation, normal T cell expressed and presumably secreted; CB1/2R = cannabinoid receptor 1/2; fMLP = N-formylmethionine-leucyl-phenylalanine; PMA = phorbol 12-myristate 13-acetate; NET = neutrophil extracellular traps; cfDNA = cell free DNA; I/R = ischemia/reperfusion; i.p. = intraperitoneally; N1/2 = neutrophils 1/2; UVA/UVB = ultra-violet light A and B; PGE<sub>2</sub> = prostaglandin E<sub>2</sub>;
